# Supplementary material
Source: Springer Nature journal article supplement (https://www.springermedizin.de/resource/supplementary/12885_2006_624_MOESM3_ESM.pdf/9469934)

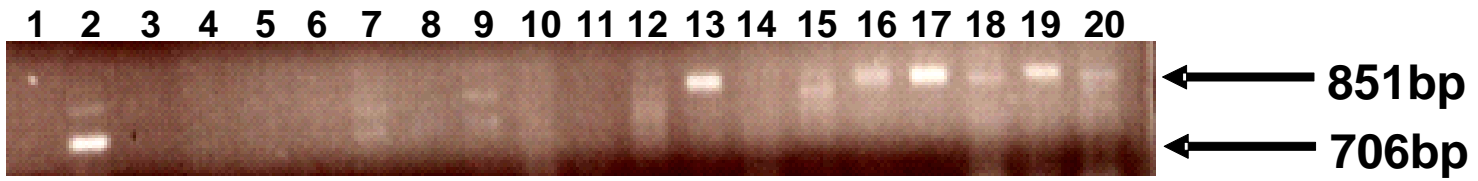

**WT1**

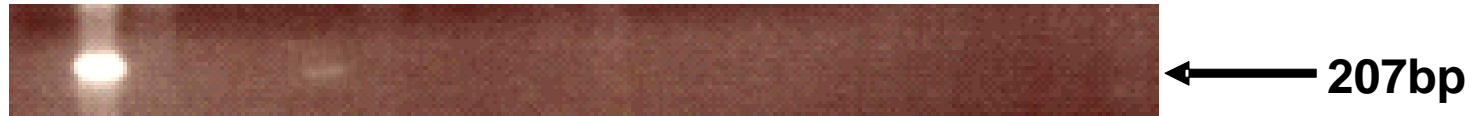

**MART1**

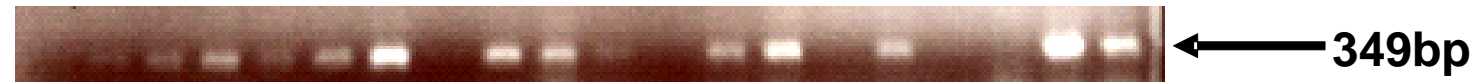

**TACC1**

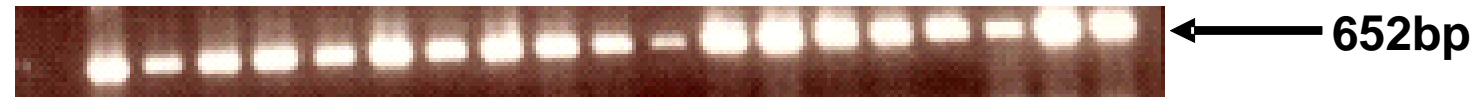

**ACTIN**

Supplement: MOESM3 [file 9469934]
